# Supplementary material for: Antimicrobial Susceptibility Patterns for Bacteria Isolated From Infected Wounds in Patients Attending Mbale Regional Referral Hospital
Source: Research Square preprint supplement (doi:10.21203/rs.3.rs-5858549/v1), 2025-04-10
Supplement: Supplementary file 1 [file fc545093d4311df633291bb8.pdf]

## 1 Susceptibility patterns the microbes

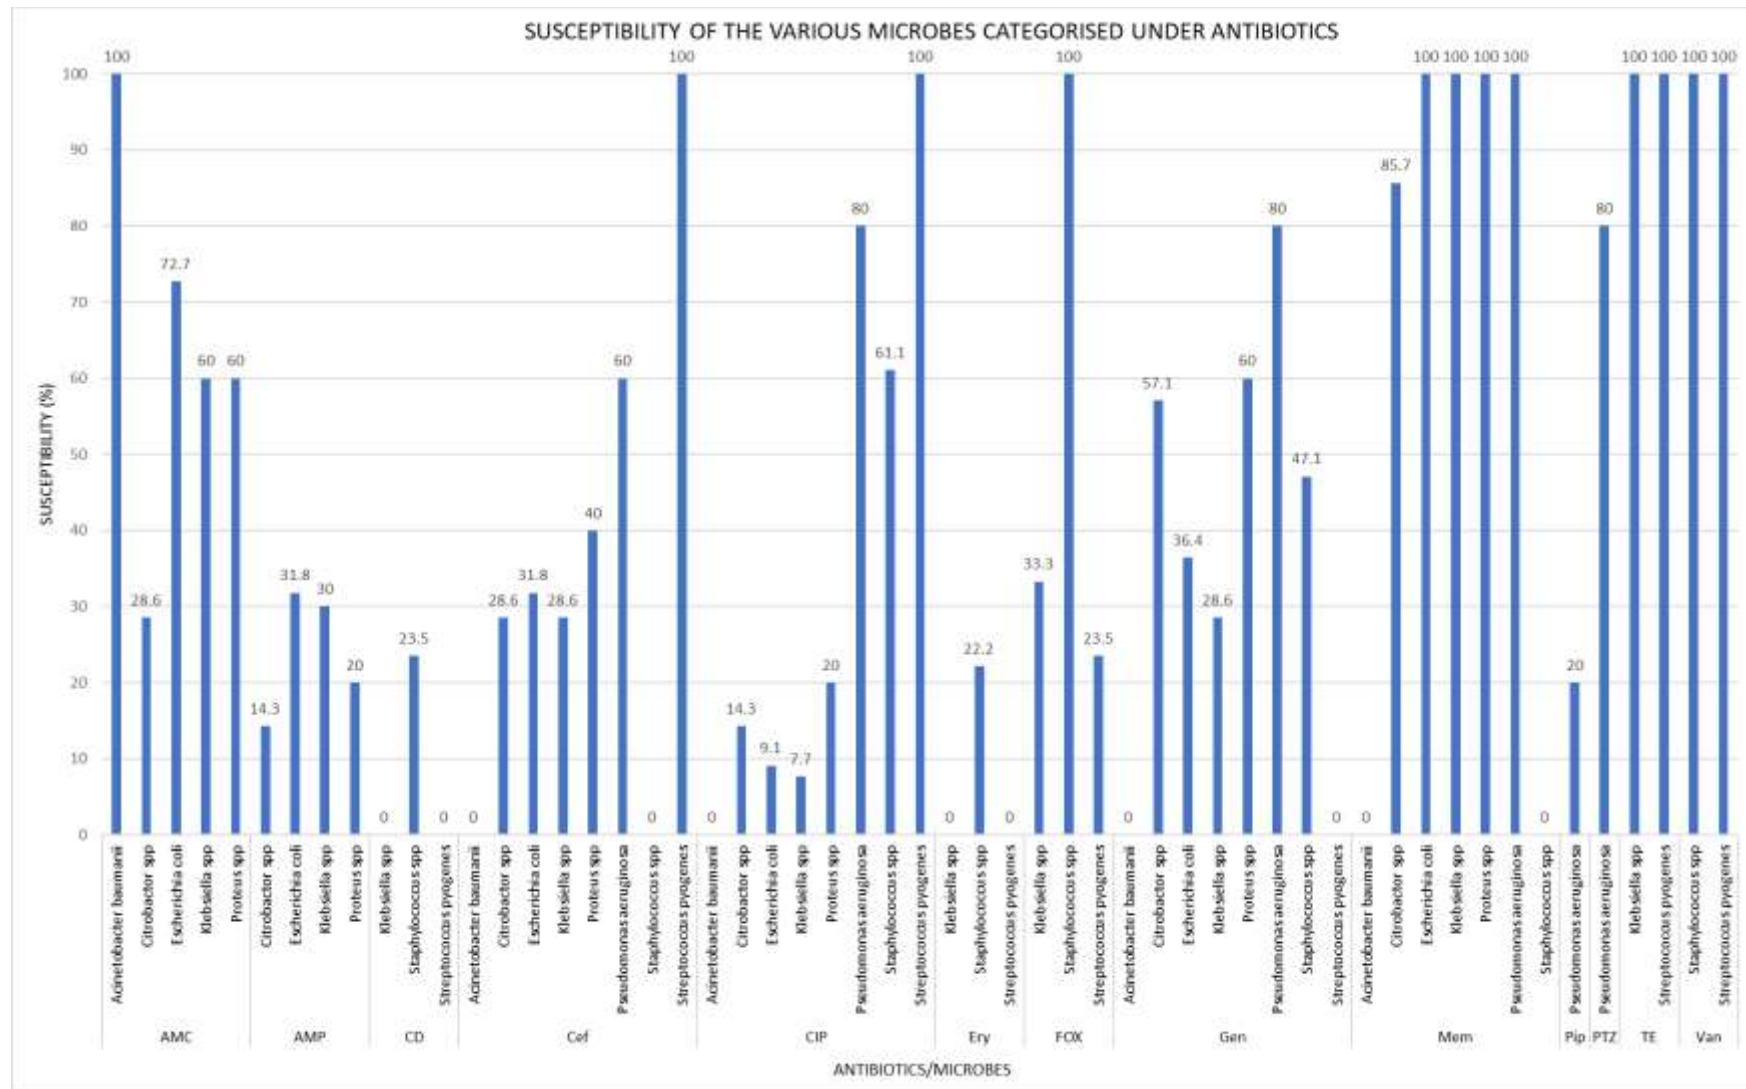

3 Figure 1: Resistance patterns of the microbes

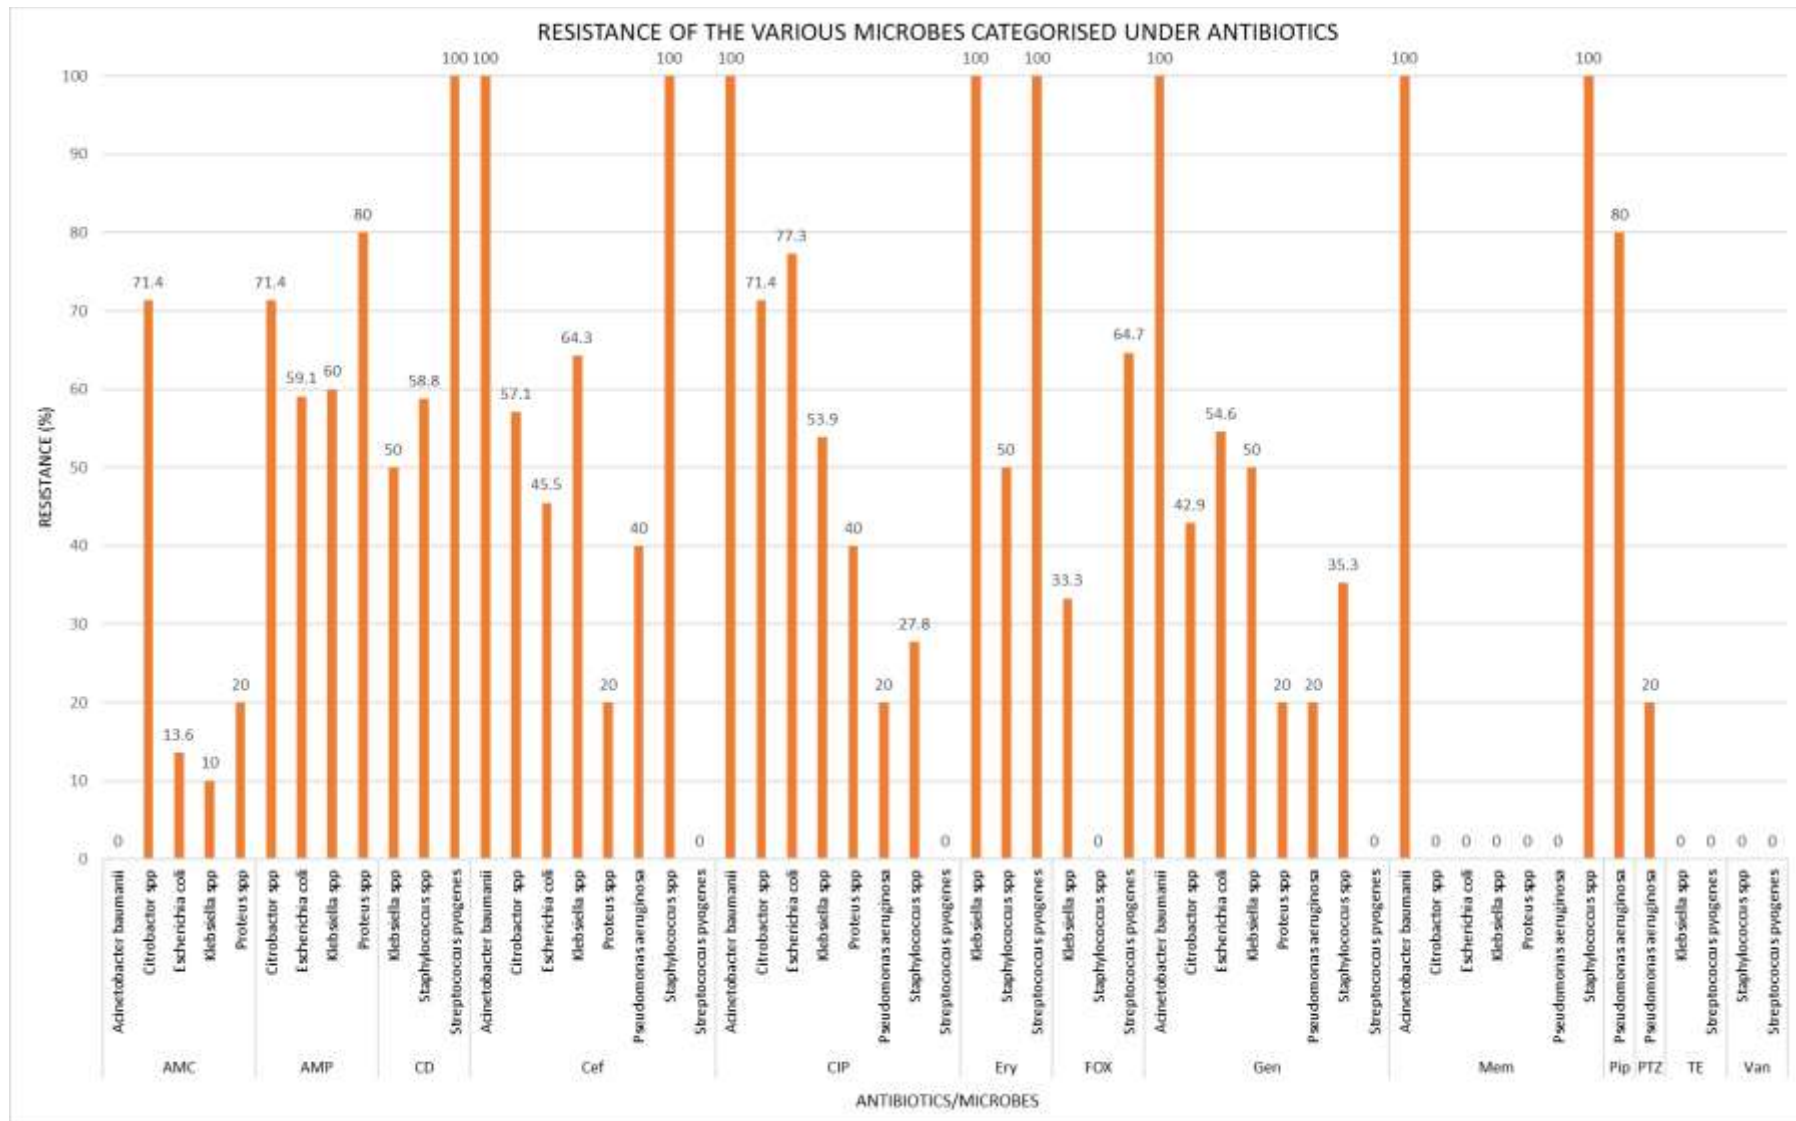

Figure 2: Susceptibility Patterns towards the Antibiotics

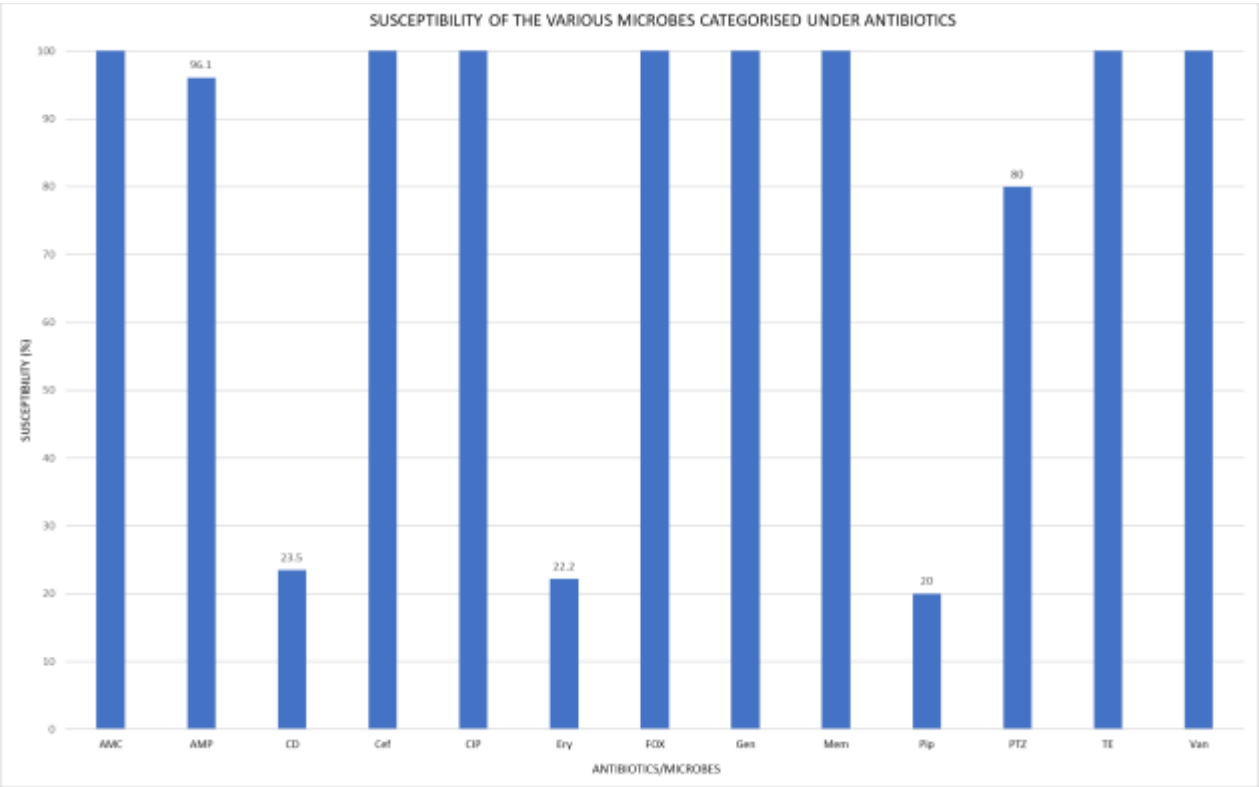

Figure 3: Resistance Patterns to the Antibiotics

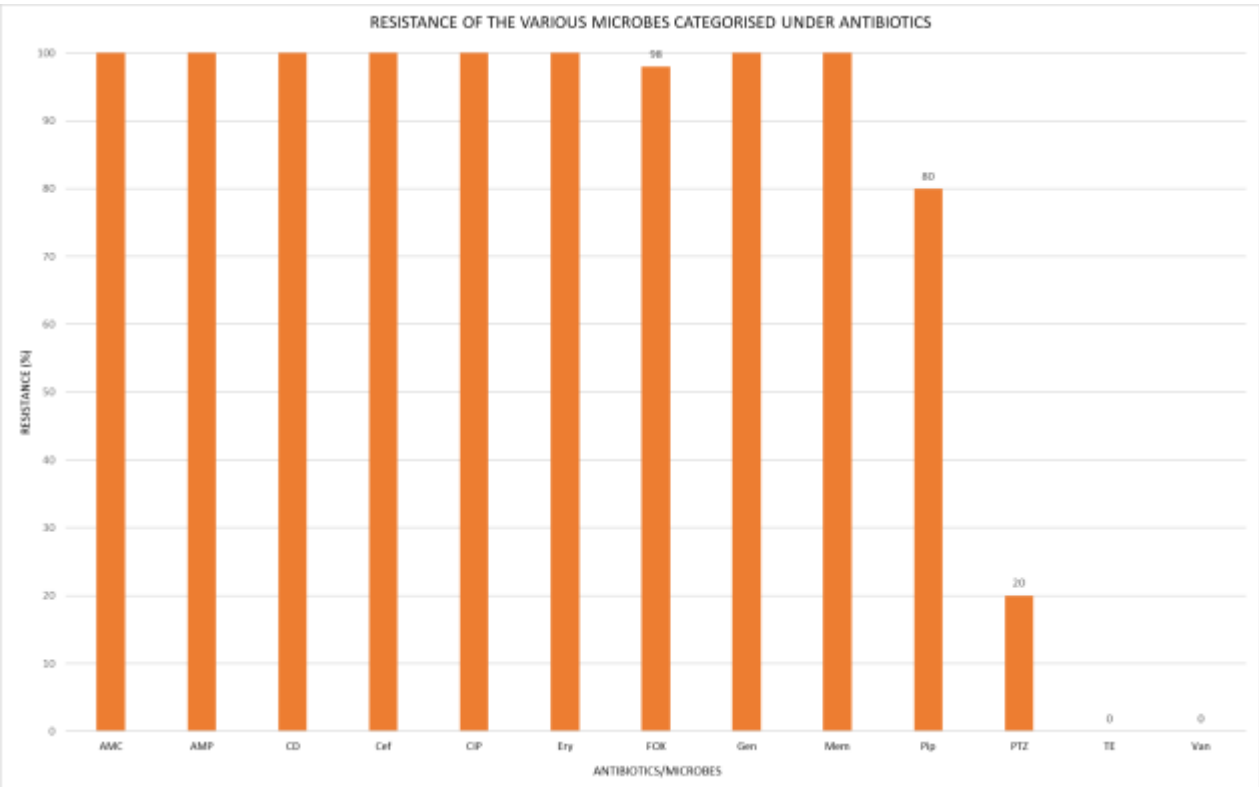

In figure 2 and figure 4, shows the sensitivity patterns were meropenem, vancomycin, and Piperacillin tazobactam were more sensitive to most of the bacteria isolates from wound swabs.

In figure 3 and figure 5, these showed the resistance patterns, most antibiotics which had high resistance were Clindamycin, ampicillin, ceftriaxone, ciprofloxacin and amoxiclav
